# Supplementary material
Source: MDPI journal article supplement (https://www.mdpi.com/2227-9717/7/5/267)

NA2

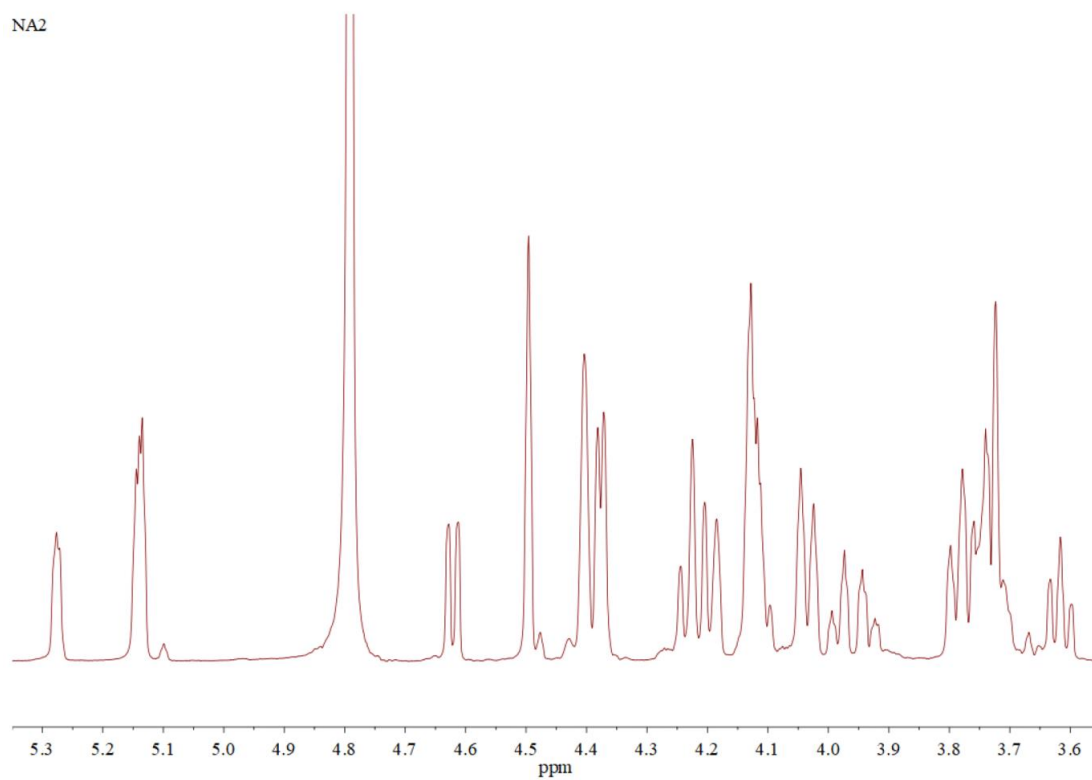

NA6

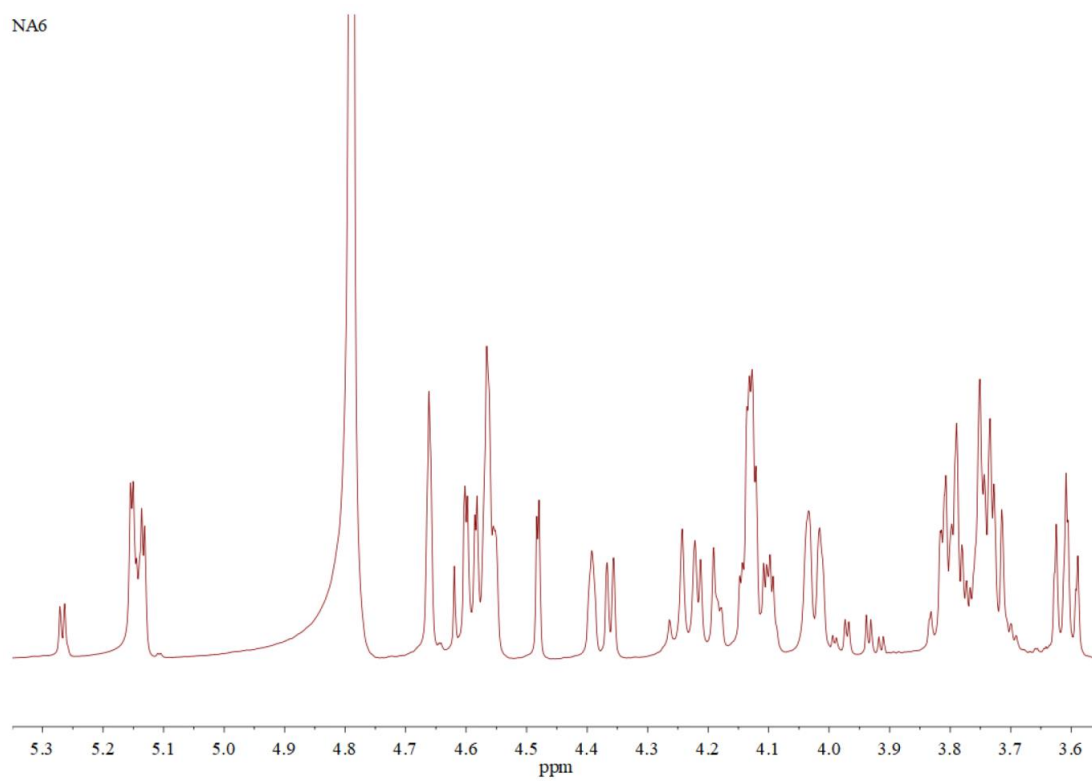

NA8

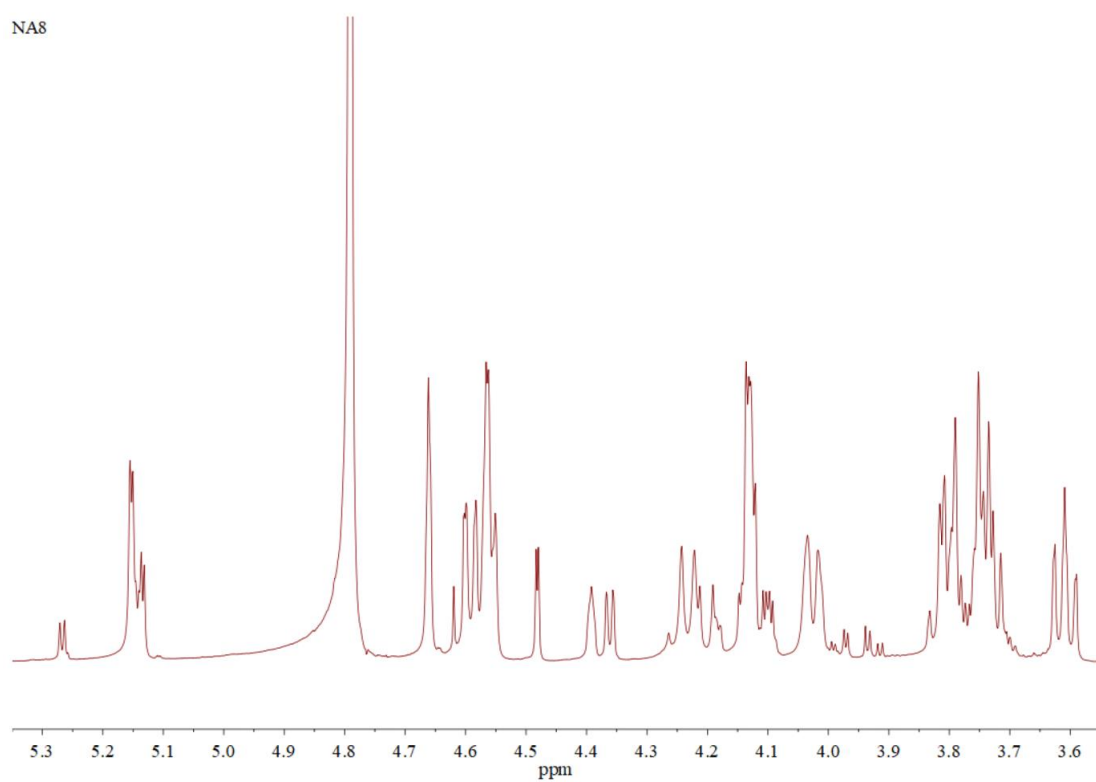

NA10

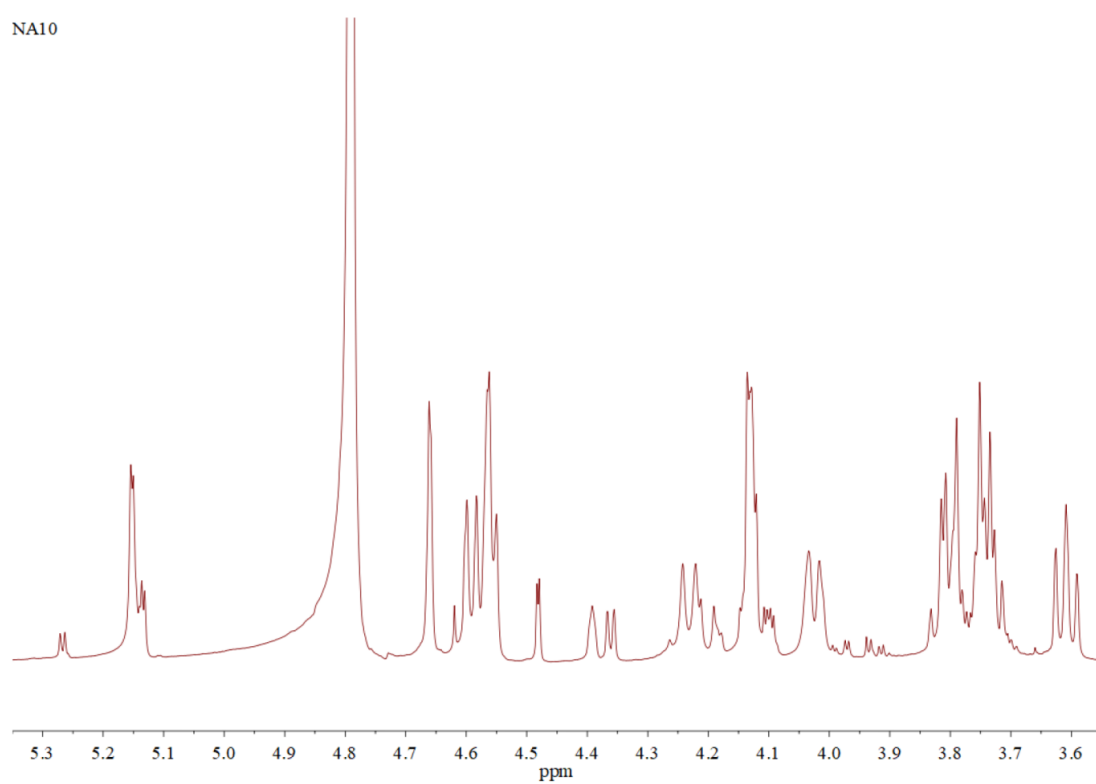

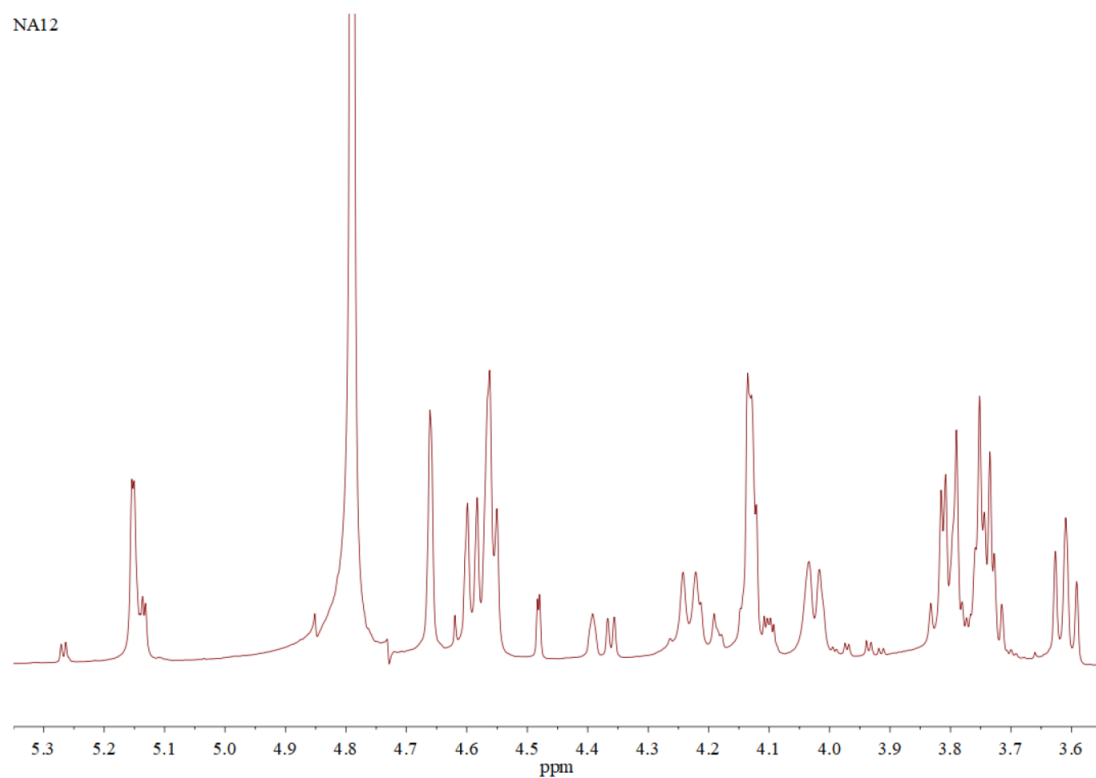

**S2 Fig.  $^1\text{H}$  NMR spectra of NA2, NA6, NA8, NA10 and NA12**

Supplement: s1 [file s1]

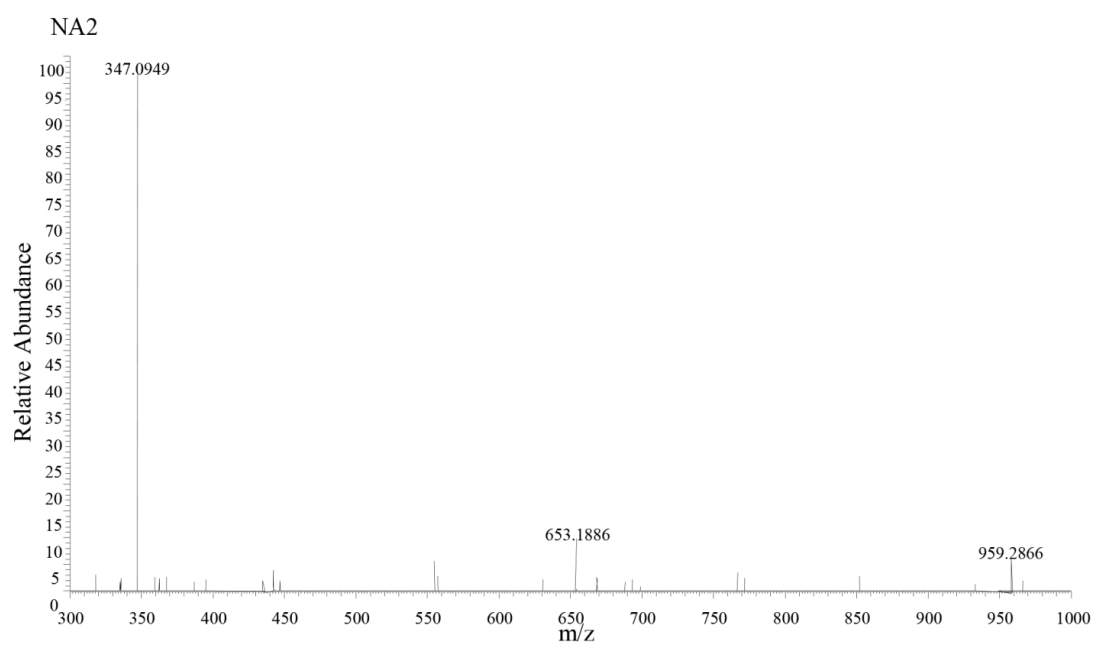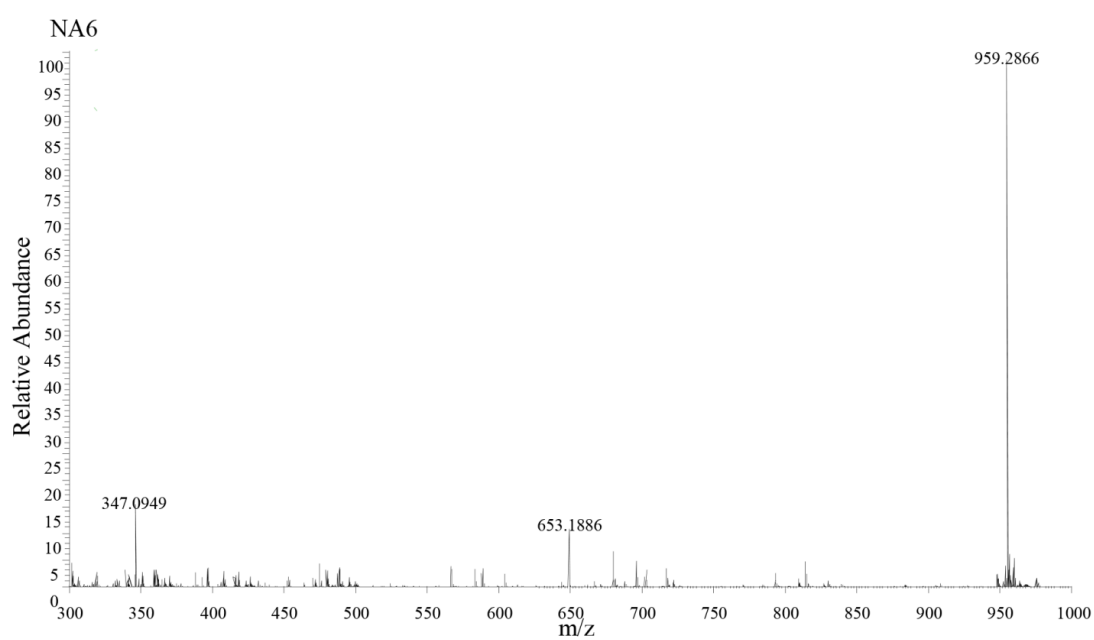

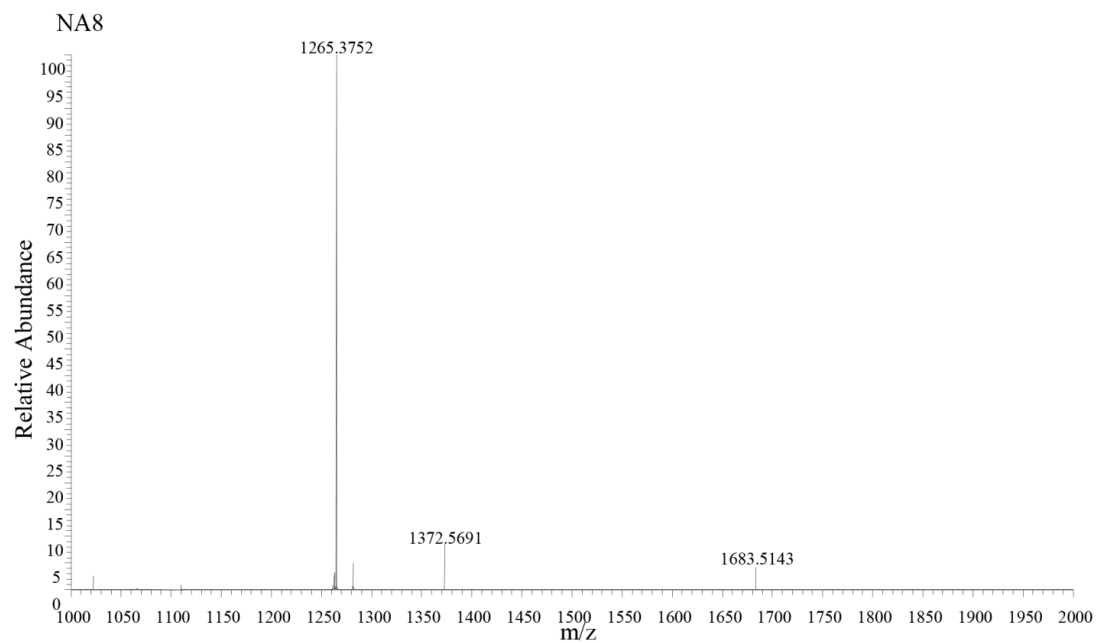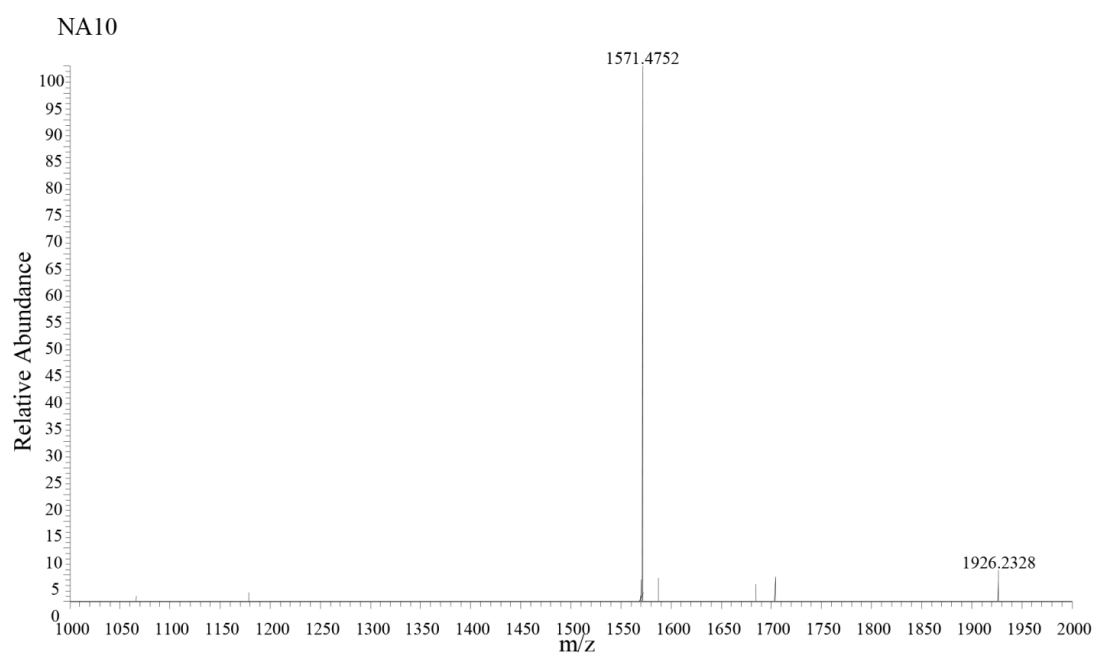

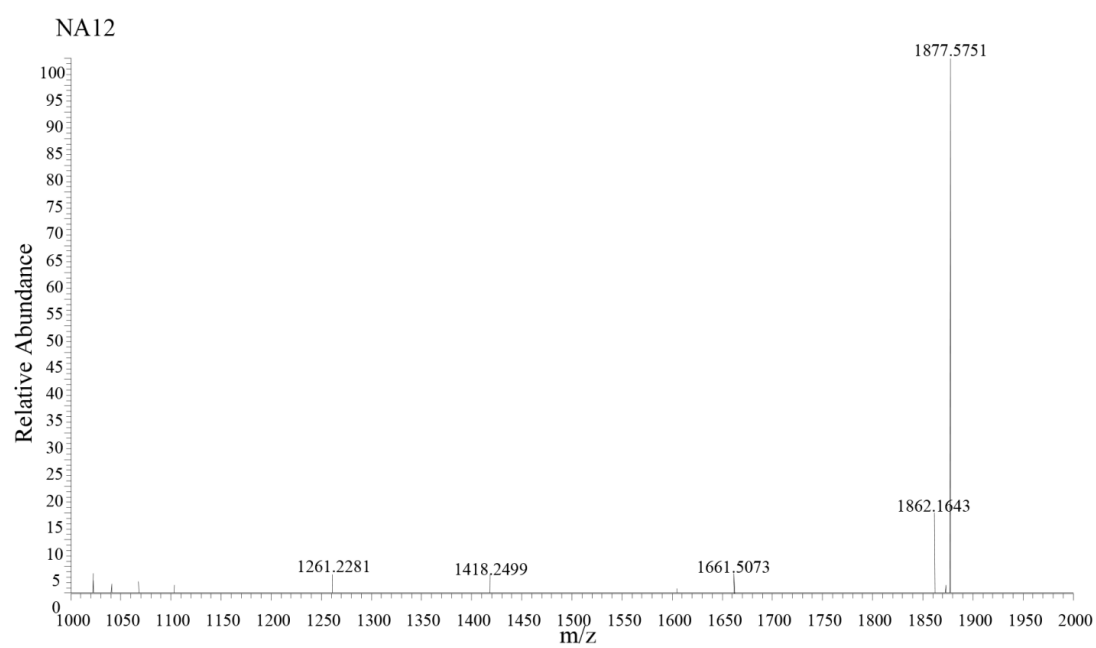

**S1 Fig. The ESIMS spectra of NA2, NA6, NA8, NA10 and NA12**

Supplement: s1 [file s1]

NA2

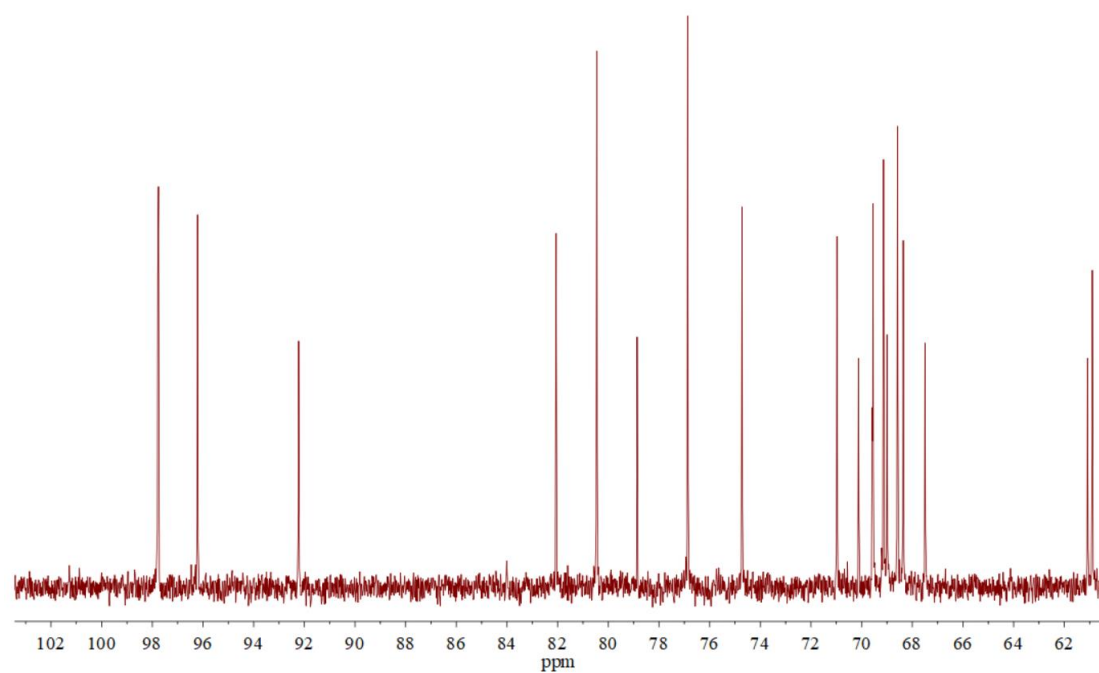

NA6

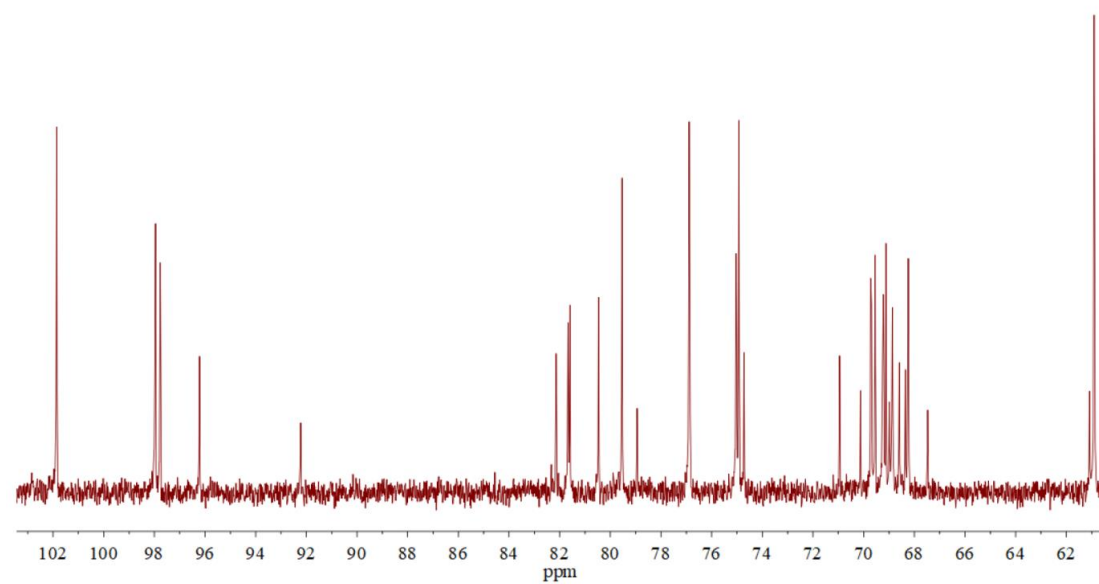

NA8

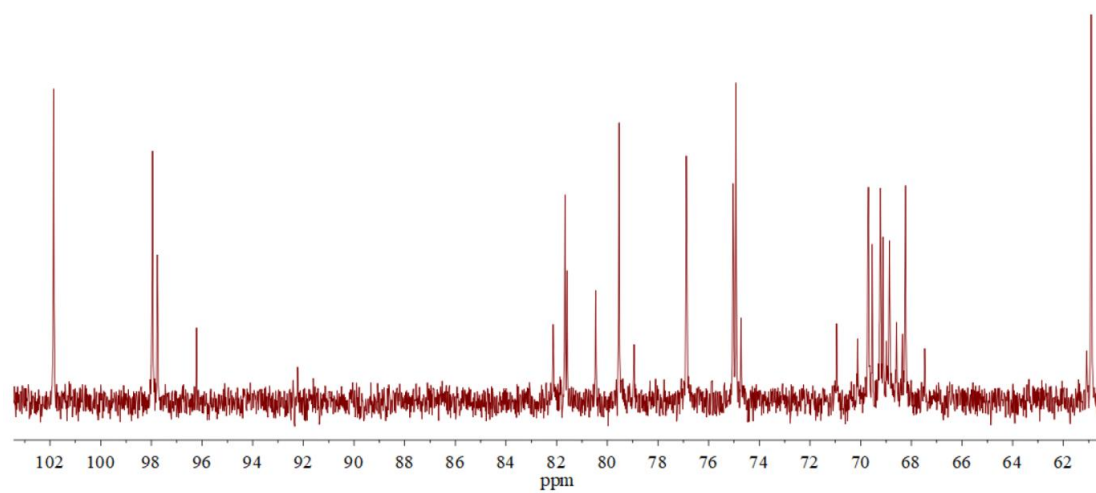

NA10

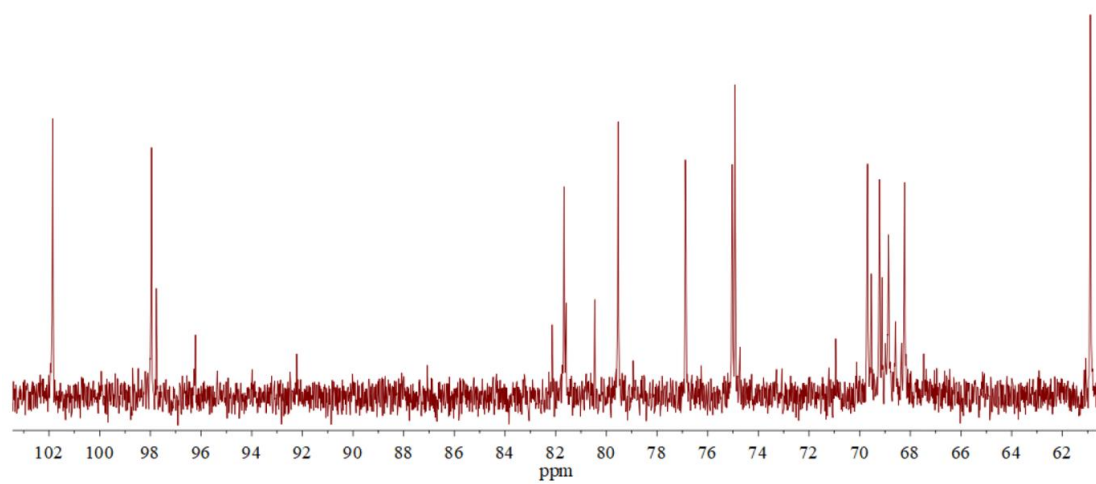

NA12

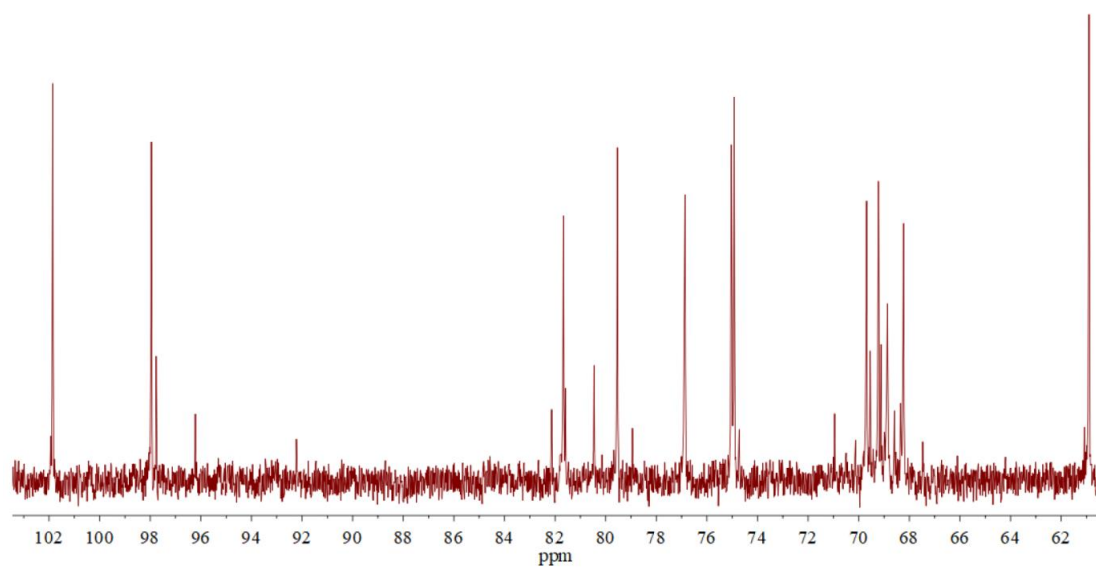

**S3 Fig.  $^{13}\text{C}$ -NMR spectra of NA2, NA6, NA8, NA10 and NA12**

Supplement: s1 [file s1]
